# Supplementary material for: Effects of methimazole and propylthiouracil exposure during pregnancy on the risk of neonatal congenital malformations: A meta-analysis
Source: PubMed Central journal article supplement (PMC5495385; doi:10.1371/journal.pone.0180108), 2017-07-03
Supplement: pone.0180108.s001.pdf [file pone.0180108.s001.pdf]

#15 #13 OR #14 10893  
 #16 #6 OR #9 OR #12 OR #15 16117  
 #17 "Congenital Abnormalities"[Mesh] 525239  
 #18 (((((((((((((((Abnormality, Congenital[Title/Abstract]) OR Congenital  
 Abnormality[Title/Abstract]) OR Deformities[Title/Abstract]) OR  
 Deformity[Title/Abstract]) OR Congenital Defects[Title/Abstract]) OR  
 Congenital Defect[Title/Abstract]) OR Defect, Congenital[Title/Abstract])  
 OR Defects, Congenital[Title/Abstract]) OR Abnormalities,  
 Congenital[Title/Abstract]) OR Birth Defects[Title/Abstract]) OR Birth  
 Defect[Title/Abstract]) OR Defect, Birth[Title/Abstract]) OR Defects,  
 Birth[Title/Abstract]) OR Congenital malformations[Title/Abstract]) OR  
 Abnormalities-drug induced[Title/Abstract]) OR Congenital  
 anomalies[Title/Abstract]) OR Pregnancy outcomes[Title/Abstract]) OR  
 Neonatal outcomes[Title/Abstract] 209357  
 #19 #17 OR #18 627236  
 #20 #3 AND #16 AND #19 191

#### EMBASE

#1 'Pregnancy'/exp 668173  
 #2 'pregnancies':ab,ti OR 'gestation':ab,ti 207209  
 #3 #1 OR #2 746955  
 #4 'thiamazole'/exp 8320  
 #5 'methimazole':ab,ti OR 'methyl-2-mercaptoimidazole':ab,ti OR '1 methyl 2  
 mercaptoimidazole':ab,ti OR 'methylmercaptoimidazole':ab,ti  
 OR 'tiamazol':ab,ti OR 'thimazol':ab,ti OR 'mercasolyl':ab,ti  
 OR 'mercazolyl':ab,ti OR 'methymazol':ab,ti OR 'merkazolil':ab,ti  
 OR 'thiamazole':ab,ti OR 'mercazol':ab,ti OR 'mercazole':ab,ti  
 OR 'metisol':ab,ti OR 'metizol':ab,ti OR 'tapazole':ab,ti OR 'jones brand of  
 methimazole':ab,ti OR 'elililly brand of methimazole':ab,ti OR 'tirodril':ab,ti  
 OR 'estedi brand of methimazole':ab,ti OR 'strumazol':ab,ti  
 OR 'nourypharma brand of methimazole':ab,ti OR 'thiamazolhenning':ab,ti  
 OR 'henning, thiamazol':ab,ti OR 'sanofisynthelabo brand of  
 methimazole':ab,ti OR 'henning berlin brand of methimazole':ab,ti  
 OR 'thiamazolhexal':ab,ti OR 'hexal, thiamazol':ab,ti OR 'hexal brand of  
 methimazole':ab,ti OR 'thyrozol':ab,ti OR 'merck brand of  
 methimazole':ab,ti OR 'favistan':ab,ti OR 'temmler brand of  
 methimazole':ab,ti OR 'methizol':ab,ti OR 'philopharm brand of  
 methimazole':ab,ti OR 'methylthiouracil':ab,ti 4614  
 #6 #4 OR #5 9446  
 #7 'Propylthiouracil'/exp 9055  
 #8 '6-propyl-2-thiouracil':ab,ti OR '6 propyl 2 thiouracil':ab,ti 184  
 #9 #7 OR #8 9086  
 #10 'Carbimazole'/exp 3673  
 #11 'carbimazolehenning':ab,ti OR 'sanofisynthelabo brand of carbimazole':ab,ti

- OR 'henning berlin brand of carbimazole':ab,ti OR 'neo-thyreostat':ab,ti  
OR 'herbrand brand of carbimazole':ab,ti OR 'neomercazole':ab,ti OR 'roche  
brand of carbimazole':ab,ti OR 'neo-mercazole':ab,ti OR 'neo tomizol':ab,ti  
OR 'tarbis brand of carbimazole':ab,ti 43
- #12 #10 OR #11 3689
- #13 'antithyroid agent'/exp 90479
- #14 'antithyroid agents':ab,ti OR 'agents, antithyroid':ab,ti OR 'thyroid  
antagonists':ab,ti OR 'antagonists, thyroid':ab,ti OR 'antithyroid drugs':ab,ti  
OR 'drugs, antithyroid':ab,ti OR 'goitrogens':ab,ti OR 'antithyroid  
effect':ab,ti OR 'effect, antithyroid':ab,ti OR 'antithyroid effects':ab,ti  
OR 'effects, antithyroid':ab,ti 2608
- #15 #13 OR #14 90922
- #16 #6 OR #9 OR #12 OR #15 91404
- #17 'congenital disorder'/exp 1219310
- #18 'congenital abnormalities':ab,ti OR 'abnormality, congenital':ab,ti  
OR 'congenital abnormality':ab,ti OR 'deformities':ab,ti OR 'deformity':ab,ti  
OR 'congenital defects':ab,ti OR 'congenital defect':ab,ti OR 'defect,  
congenital':ab,ti OR 'defects, congenital':ab,ti OR 'abnormalities,  
congenital':ab,ti OR 'birth defects':ab,ti OR 'birth defect':ab,ti OR 'defect,  
birth':ab,ti OR 'defects, birth':ab,ti OR 'congenital malformations':ab,ti  
OR 'abnormalities-drug induced':ab,ti OR 'congenital anomalies':ab,ti  
OR 'pregnancy outcomes':ab,ti OR 'neonatal outcomes':ab,ti 128750
- #19 #17 OR #18 1277980
- #20 #3 AND #16 AND #19 769

### **CENTRAL (Cochrane Central Register of Controlled Trials)**

- #1 MeSH descriptor: [Pregnancy] explode all tree 6486
- #2 'Pregnancies' or 'Gestation':ti,ab,kw (Word variations have been searched)  
31799
- #3 #1 OR #2 32008
- #4 MeSH descriptor: [Methimazole] explode all trees 135
- #5 'thiamazole' or 'Methyl-2-mercaptoimidazole' or '1 Methyl 2  
mercaptoimidazole' or 'Methylmercaptoimidazole' or 'Tiamazol' or  
'Thimazol' or 'Mercasolyl' or 'Mercazolyl' or 'Methymazol' or 'Merkazolil'  
or 'Thiamazole' or 'Mercazol' or 'Mercazole' or 'Metisol' or 'Metizol' or  
'Tapazole' or 'Jones Brand of Methimazole' or 'Eli Lilly Brand of  
Methimazole' or 'Tirodril' or 'Estedi Brand of Methimazole' or 'Strumazol'  
or 'Nourypharma Brand of Methimazole' or 'ThiamazolHenning' OR  
'Henning, Thiamazol' or 'SanofiSynthelabo Brand of Methimazole' or  
'Henning Berlin Brand of Methimazole' or 'ThiamazolHexal' or 'Hexal,  
Thiamazol' or 'Hexal Brand of Methimazole' or 'Thyrozol' or 'Merck  
Brand of Methimazole' or 'Favistan' or 'Temmler Brand of Methimazole' or  
'Methizol' or 'Philopharm Brand of Methimazole' or  
'Methylthiouracil':ti,ab,kw (Word variations have been searched) 85

|     |                                                                                                                                                                                                                                                                                                                                                                                                                                                                                                                |                                 |  |
|-----|----------------------------------------------------------------------------------------------------------------------------------------------------------------------------------------------------------------------------------------------------------------------------------------------------------------------------------------------------------------------------------------------------------------------------------------------------------------------------------------------------------------|---------------------------------|--|
| #6  | #4 OR #5                                                                                                                                                                                                                                                                                                                                                                                                                                                                                                       | 199                             |  |
| #7  | MeSH descriptor: [Propylthiouracil] explode all trees                                                                                                                                                                                                                                                                                                                                                                                                                                                          | 62                              |  |
| #8  | '6-Propyl-2-Thiouracil' or '6 Propyl 2 Thiouracil':ti,ab,kw (Word variations have been searched)                                                                                                                                                                                                                                                                                                                                                                                                               | 3                               |  |
| #9  | #7 OR #8                                                                                                                                                                                                                                                                                                                                                                                                                                                                                                       | 64                              |  |
| #10 | MeSH descriptor: [Carbimazole] explode all trees                                                                                                                                                                                                                                                                                                                                                                                                                                                               | 46                              |  |
| #11 | 'Carbimazole Henning' or 'SanofiSynthelabo Brand of Carbimazole' or 'Henning Berlin Brand of Carbimazole' or 'Neo-Thyreostat' or 'Herbrand Brand of Carbimazole' or 'Neomercazole' or 'Roche Brand of Carbimazole' or 'Neo-Mercazole' or 'Neo Tomizol' or 'Taris Brand of Carbimazole':ti,ab,kw (Word variations have been searched)                                                                                                                                                                           | 0                               |  |
| #12 | #10 OR #11                                                                                                                                                                                                                                                                                                                                                                                                                                                                                                     | 46                              |  |
| #13 | MeSH descriptor: [Antithyroid Agents] explode all trees                                                                                                                                                                                                                                                                                                                                                                                                                                                        | 178                             |  |
| #14 | 'Antithyroid Agent' or 'Agents, Antithyroid' or 'Thyroid Antagonists' or 'Antagonists, Thyroid' or 'Antithyroid Drugs' or 'Drugs, Antithyroid' or 'Goitrogens' or 'Antithyroid Effect' or 'Effect, Antithyroid' or 'Antithyroid Effects' or 'Effects, Antithyroid':ti,ab,kw (Word variations have been searched)                                                                                                                                                                                               | 390                             |  |
| #15 | #13 OR #14                                                                                                                                                                                                                                                                                                                                                                                                                                                                                                     | 390                             |  |
| #16 | #6 OR #9 OR #12 OR #15                                                                                                                                                                                                                                                                                                                                                                                                                                                                                         | 510                             |  |
| #17 | MeSH descriptor: [Congenital Abnormalities] explode all trees                                                                                                                                                                                                                                                                                                                                                                                                                                                  | 4384                            |  |
| #18 | 'Congenital disorder' or 'Abnormality, Congenital' or 'Congenital Abnormality' or 'Deformities' or 'Deformity' or 'Congenital Defects' or 'Congenital Defect' or 'Defect, Congenital' or 'Defects, Congenital' or 'Abnormalities, Congenital' or 'Birth Defects' or 'Birth Defect' or 'Defect, Birth' or 'Defects, Birth' or 'Congenital malformations' or 'Abnormalities-drug induced' or 'Congenital anomalies' or 'Pregnancy outcomes' or 'Neonatal outcomes':ti,ab,kw (Word variations have been searched) | 19130                           |  |
| #19 | #17 OR #18                                                                                                                                                                                                                                                                                                                                                                                                                                                                                                     | 22315                           |  |
| #20 | #3 AND #16 AND #19                                                                                                                                                                                                                                                                                                                                                                                                                                                                                             | 11(9 Trials; 2Cochrane Reviews) |  |
