# Supplementary material for: Effects of methimazole and propylthiouracil exposure during pregnancy on the risk of neonatal congenital malformations: A meta-analysis
Source: PLoS One. 2017 Jul 3;12(7):e0180108. doi: 10.1371/journal.pone.0180108 (PMC5495385; doi:10.1371/journal.pone.0180108)
Supplement: S2 Table — (PDF) [file pone.0180108.s002.pdf]

**Supplementary table 2. The Newcastle-Ottawa Scale (NOS) quality assessment of the included studies in this meta-analysis(details).**

| <b>Cohort Star Template</b>       |                                                |                                           |                              |                                                                                   |                                                                                  |                              |                                                         |                                        |
|-----------------------------------|------------------------------------------------|-------------------------------------------|------------------------------|-----------------------------------------------------------------------------------|----------------------------------------------------------------------------------|------------------------------|---------------------------------------------------------|----------------------------------------|
| <b>Study</b>                      | <b>Selection of cohorts</b>                    |                                           |                              |                                                                                   | <b>Comparability of cohorts</b>                                                  | <b>Outcome</b>               |                                                         |                                        |
|                                   | Representativeness<br>of the exposed<br>cohort | Selection of the<br>non exposed<br>cohort | Ascertainment<br>of exposure | Demonstration that<br>outcome of interest<br>was not present at<br>start of study | Comparability of cohorts on<br>the basis of the design<br>or analysis            | Assessment<br>of outcome     | Was follow up<br>long enough for<br>outcomes to occur   | Adequacy of<br>follow up of<br>cohorts |
| <b>Wing</b>                       | ☆                                              | ☆                                         | ☆                            | ☆                                                                                 | ☆                                                                                | ☆                            | ☆                                                       | ☆                                      |
| <b>Gianantonio</b>                | ☆                                              | ☆                                         |                              | ☆                                                                                 | ☆                                                                                |                              | ☆                                                       | ☆                                      |
| <b>Lian</b>                       |                                                | ☆                                         | ☆                            | ☆                                                                                 |                                                                                  | ☆                            | ☆                                                       | ☆                                      |
| <b>Rosenfeld</b>                  | ☆                                              | ☆                                         | ☆                            | ☆                                                                                 | ☆                                                                                | ☆                            | ☆                                                       |                                        |
| <b>Yoshihara</b>                  | ☆                                              | ☆                                         | ☆                            | ☆                                                                                 | ☆                                                                                | ☆                            | ☆                                                       | ☆                                      |
| <b>Andersen</b>                   | ☆                                              | ☆                                         | ☆                            | ☆                                                                                 | ☆☆                                                                               | ☆                            | ☆                                                       | ☆                                      |
| <b>Korelitz</b>                   | ☆                                              | ☆                                         | ☆                            | ☆                                                                                 | ☆                                                                                | ☆                            | ☆                                                       | ☆                                      |
| <b>Lo</b>                         | ☆                                              | ☆                                         | ☆                            | ☆                                                                                 | ☆                                                                                | ☆                            | ☆                                                       | ☆                                      |
| <b>Hawken</b>                     | ☆                                              |                                           | ☆                            | ☆                                                                                 |                                                                                  | ☆                            | ☆                                                       | ☆                                      |
| <b>Case-Control Star Template</b> |                                                |                                           |                              |                                                                                   |                                                                                  |                              |                                                         |                                        |
| <b>Study</b>                      | <b>Selection of case and controls</b>          |                                           |                              |                                                                                   | <b>Comparability of cases<br/>and controls</b>                                   | <b>Exposure</b>              |                                                         |                                        |
|                                   | Is the case<br>definition<br>adequate          | Representativeness<br>of the cases        | Selection of<br>Controls     | Definition of Controls                                                            | Comparability of cases and<br>controls on the basis of the<br>design or analysis | Ascertainment<br>of exposure | Same method of<br>ascertainment for<br>casesandcontrols | Non-<br>Response<br>Rate               |
| <b>Momotani</b>                   | ☆                                              | ☆                                         | ☆                            | ☆                                                                                 | ☆                                                                                | ☆                            | ☆                                                       |                                        |
| <b>Clementi</b>                   | ☆                                              | ☆                                         | ☆                            | ☆                                                                                 | ☆☆                                                                               |                              | ☆                                                       |                                        |
| <b>Chen</b>                       | ☆                                              | ☆                                         | ☆                            | ☆                                                                                 | ☆                                                                                | ☆                            | ☆                                                       |                                        |

**Supplementary table 2. The Newcastle-Ottawa Scale (NOS) quality assessment of the included studies in this meta-analysis(details).**

| <b>Cohort Star Template</b>       |                                                |                                           |                              |                                                                                   |                                                                                  |                              |                                                         |                                        |
|-----------------------------------|------------------------------------------------|-------------------------------------------|------------------------------|-----------------------------------------------------------------------------------|----------------------------------------------------------------------------------|------------------------------|---------------------------------------------------------|----------------------------------------|
| <b>Study</b>                      | <b>Selection of cohorts</b>                    |                                           |                              |                                                                                   | <b>Comparability of cohorts</b>                                                  | <b>Outcome</b>               |                                                         |                                        |
|                                   | Representativeness<br>of the exposed<br>cohort | Selection of the<br>non exposed<br>cohort | Ascertainment<br>of exposure | Demonstration that<br>outcome of interest<br>was not present at<br>start of study | Comparability of cohorts on<br>the basis of the design<br>or analysis            | Assessment<br>of outcome     | Was follow up<br>long enough for<br>outcomes to occur   | Adequacy of<br>follow up of<br>cohorts |
| <b>Wing</b>                       | ☆                                              | ☆                                         | ☆                            | ☆                                                                                 | ☆                                                                                | ☆                            | ☆                                                       | ☆                                      |
| <b>Gianantonio</b>                | ☆                                              | ☆                                         |                              | ☆                                                                                 | ☆                                                                                |                              | ☆                                                       | ☆                                      |
| <b>Lian</b>                       |                                                | ☆                                         | ☆                            | ☆                                                                                 |                                                                                  | ☆                            | ☆                                                       | ☆                                      |
| <b>Rosenfeld</b>                  | ☆                                              | ☆                                         | ☆                            | ☆                                                                                 | ☆                                                                                | ☆                            | ☆                                                       |                                        |
| <b>Yoshihara</b>                  | ☆                                              | ☆                                         | ☆                            | ☆                                                                                 | ☆                                                                                | ☆                            | ☆                                                       | ☆                                      |
| <b>Andersen</b>                   | ☆                                              | ☆                                         | ☆                            | ☆                                                                                 | ☆☆                                                                               | ☆                            | ☆                                                       | ☆                                      |
| <b>Korelitz</b>                   | ☆                                              | ☆                                         | ☆                            | ☆                                                                                 | ☆                                                                                | ☆                            | ☆                                                       | ☆                                      |
| <b>Lo</b>                         | ☆                                              | ☆                                         | ☆                            | ☆                                                                                 | ☆                                                                                | ☆                            | ☆                                                       | ☆                                      |
| <b>Hawken</b>                     | ☆                                              |                                           | ☆                            | ☆                                                                                 |                                                                                  | ☆                            | ☆                                                       | ☆                                      |
| <b>Case-Control Star Template</b> |                                                |                                           |                              |                                                                                   |                                                                                  |                              |                                                         |                                        |
| <b>Study</b>                      | <b>Selection of case and controls</b>          |                                           |                              |                                                                                   | <b>Comparability of cases<br/>and controls</b>                                   | <b>Exposure</b>              |                                                         |                                        |
|                                   | Is the case<br>definition<br>adequate          | Representativeness<br>of the cases        | Selection of<br>Controls     | Definition of Controls                                                            | Comparability of cases and<br>controls on the basis of the<br>design or analysis | Ascertainment<br>of exposure | Same method of<br>ascertainment for<br>casesandcontrols | Non-<br>Response<br>Rate               |
| <b>Momotani</b>                   | ☆                                              | ☆                                         | ☆                            | ☆                                                                                 | ☆                                                                                | ☆                            | ☆                                                       |                                        |
| <b>Clementi</b>                   | ☆                                              | ☆                                         | ☆                            | ☆                                                                                 | ☆☆                                                                               |                              | ☆                                                       |                                        |
| <b>Chen</b>                       | ☆                                              | ☆                                         | ☆                            | ☆                                                                                 | ☆                                                                                | ☆                            | ☆                                                       |                                        |
